# Supplementary material for: Synergistic improvements in the processability and mechanical properties of cyanate esters via aminobenzonitrile-induced chemical tailoring
Source: Royal Society of Chemistry journal article supplement (doi:10.1039/d4ta02460e), 2024-01-01
Supplement: d4ta02460e1.pdf [file d4ta02460e1.pdf]

## Supporting Information

### Synergistic improvements in processability and mechanical properties of cyanate esters via aminobenzonitrile-induced chemical tailoring

Jun Jiang, Xiaofang Tao, Tao Yang, Dingding Chen, Changping Yin, Suli Xing\*,  
Jun Tang\*

<sup>1</sup>College of Aerospace Science and Engineering, National University of Defense  
Technology, Changsha, China

E-mail: [happy\\_xing@nudt.edu.cn](mailto:happy_xing@nudt.edu.cn); [jun.tang@nudt.edu.cn](mailto:jun.tang@nudt.edu.cn)

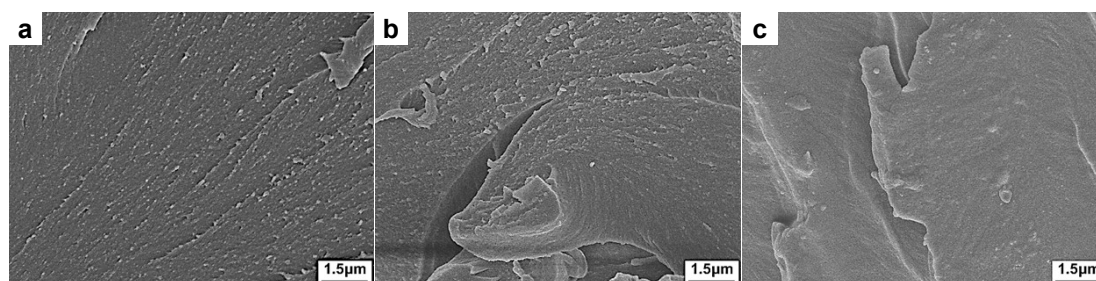

**Figure S1.** SEM fracture morphology of the BECE/ABN<sub>x</sub> after impact testing. (a) 10% ABN<sub>2</sub>/BECE; (b) 10% ABN<sub>3</sub>/BECE; (c) 10% ABN<sub>4</sub>/BECE.
